# Supplementary material for: Downregulation of LUZP2 Is Correlated with Poor Prognosis of Low-Grade Glioma
Source: PubMed Central journal article supplement (PMC7368956; doi:10.1155/2020/9716720), 2020-07-09
Supplement: 9716720.f1.pdf [file 9716720.f1.pdf]

Table 1. Baseline Patient Characteristics of Included Observations from TCGA and CGGA.

| Variable                       | TCGA cohort | CGGA cohort1 | CGGA cohort2 |
|--------------------------------|-------------|--------------|--------------|
| <b>Gender</b>                  |             |              |              |
| Male                           | 279(55.2)   | 182(44.0)    | 66(37.9)     |
| Female                         | 226(44.8)   | 232(56.0)    | 108(62.1)    |
| <b>Race</b>                    |             |              |              |
| White                          | 465(92.1)   |              |              |
| Black                          | 21(4.2)     |              |              |
| Other/unknown                  | 19(3.8)     |              |              |
| <b>Age group</b>               |             |              |              |
| <31                            | 96(19.0)    | 78(18.8)     | 24(13.8)     |
| 31-40                          | 152(30.1)   | 131(31.6)    | 77(44.3)     |
| 41-50                          | 103(20.4)   | 142(34.3)    | 46(26.4)     |
| >50                            | 154(30.5)   | 63(15.2)     | 27(15.5)     |
| <b>Grade</b>                   |             |              |              |
| WHO II                         | 245(48.5)   | 171(41.3)    | 100(57.5)    |
| WHO III                        | 260(51.5)   | 243(58.7)    | 74(42.5)     |
| <b>Histology</b>               |             |              |              |
| Astrocytoma                    | 191(37.8)   | 248(59.9)    | 64(36.8)     |
| Mix glioma                     | 128 (25.3)  | 29(7.0)      | 73(42.0)     |
| Oligodendroglioma              | 186 (36.8)  | 137(33.1)    | 37(21.3)     |
| <b>IDH1_mutant</b>             |             |              |              |
| Wildtype                       | 34(6.7)     | 90(21.7)     | 44(25.3)     |
| Mutant                         | 91(18.0)    | 286(69.1)    | 129(74.1)    |
| Unknown                        | 380(75.2)   | 38(9.2)      | 1(0.6)       |
| <b>1p19q_codeletion_status</b> |             |              |              |
| Codel                          |             | 125(30.2)    | 57(32.9)     |
| Non-codel                      |             | 252(60.9)    | 115(66.1)    |
| Unknown                        |             | 37(8.9)      | 2(1.1)       |
| <b>Chemotherapy</b>            |             |              |              |
| YES                            |             | 278(67.1)    | 82(47.1)     |
| NO                             |             | 126(30.4)    | 82(47.1)     |
| Unknown                        |             | 10(2.4)      | 10(5.7)      |
| <b>Radiotherapy</b>            |             |              |              |
| YES                            | 272(53.9)   | 305(73.7)    | 20(11.5)     |
| NO                             | 167(33.1)   | 96(23.2)     | 149(85.6)    |
| Unknown                        | 66(13.1)    | 13(3.1)      | 5(2.9)       |
| <b>MGMT</b>                    |             |              |              |
| YES                            |             | 197(47.6)    |              |
| NO                             |             | 126(30.4)    |              |
| Unknown                        |             | 91(22.0)     |              |
